# Supplementary material for: secCl is a cys-loop ion channel necessary for the chloride conductance that mediates hormone-induced fluid secretion in Drosophila
Source: PubMed Central journal article supplement (PMC6522505; doi:10.1038/s41598-019-42849-9), 2019-05-16
Supplement: 41598_2019_42849_MOESM1_ESM.pdf [file 41598_2019_42849_MOESM1_ESM.pdf]

## Supplemental Information for:

### ***secCl* is a cys-loop ion channel necessary for the chloride conductance that mediates hormone-induced fluid secretion in *Drosophila*.**

Daniel Feingold<sup>1</sup>, Laura Knogler<sup>4,5</sup>, Tanja Starc<sup>2</sup>, Pierre Drapeau<sup>4</sup>, Michael J. O'Donnell<sup>3</sup>, Laura A. Nilson<sup>1</sup>, and Joseph A. Dent<sup>1</sup>

1. Department of Biology, McGill University, 1205 Dr. Penfield, Montréal, Québec, Canada, H3A 1B1.

2. Institute of Neuroscience, Technische Universität München, Biedersteiner Str. 29, München, Germany, Bau 601D-80802.

3. Department of Biology, McMaster University, 1280 Main Street West, Hamilton, Ontario, Canada, L8S 4K1.

4. Department of Neurosciences, Research Centre of the University of Montréal Hospital Centre, Montréal, Québec, Canada

5. Max Planck Institute of Neurobiology, Sensorimotor Control Research Group, Am Klopferspitz 18, Martinsried 82152, Germany

Running Title: a cys-loop channel mediates hormone-induced diuresis.

|       |     |                                                                                                            |     |
|-------|-----|------------------------------------------------------------------------------------------------------------|-----|
| secC1 | 1   | -MNLHLSEIFWITLILVLSIWTSVGVKAEEEE-----CPSMADAGS-----LQQTQ                                                   | 45  |
| glc-1 | 1   | MATWIVGKLI IASLILGIQAQQARTKSQDIFEDDNDNGTTTLESLARLTSPIHIPIEQPQ                                              | 60  |
| secC1 | 46  | LIQR--LTHVCR--YDRLERPFEYDSDGKRLPIVVKTRIYVYFLQNLNSDLLQFKMHALL                                               | 101 |
| glc-1 | 61  | TSDSKILAHLFTSGYDFRVRPPTDN--GG--PVVSVNMLLRTISKIDVVNMEYSAQLTL                                                | 116 |
| secC1 | 102 | QLRFQDKRLAYKAFNRSDNILGQKHLSERLWLPHIFFANERESSILGTDEKDVLTSLSP                                                | 161 |
| glc-1 | 117 | RESWIDKRLSYGVKGDGQPDFVILTVGHQIWPDTFFPNKQAYKHTIDKPNVLIRIHND                                                 | 176 |
| secC1 | 162 | GNV I ISTRMQASLYCWMNFQKFPFDQQFCSTVLESWMYNTSDLILEWEPHTPI SFDPEMR                                            | 221 |
| glc-1 | 177 | GTVLYSVRISLVLS <span style="border: 1px solid red;">CPMYLQYYPMDVQCC</span> SIDLASYAYTTKDIEYLWKEHSPLQLKVGLS | 236 |
|       |     | M1                                                                                                         |     |
| secC1 | 222 | LTEYNMAQFWHNTTIVQSDGDNLRHGAFAGNYSSLSFTVNLKREIGFYLLDYLLPMMIV                                                | 281 |
| glc-1 | 237 | SSLPSFQLTNTSTTYCTSVTN-----TGIYSCLRTTIQLKREFSFYLLQLYIPSCMLV                                                 | 289 |
|       |     | M2                                                                                                         |     |
| secC1 | 282 | AISWVSFWLQADASPPRIMLGTSTMLSFITLSSSQSKNLPKVSYIKVSEVWFLGCTFFIF                                               | 341 |
| glc-1 | 290 | IVSWVSFWFDRTAIPARVTLGVTLLTMTAQAGINSQLPPVSYIKAIDVWIGACMTFFIF                                                | 349 |
|       |     | M3                                                                                                         |     |
| secC1 | 342 | GSLVEFAFVNTIWRKKEINIELKKNVSKYIIKSTLTPRPARRQIGGSLSNESRARS CSSLD                                             | 401 |
| glc-1 | 350 | CALLEFALVNHIAN-KQGVVERKARTER-----EKAEIPLLQNLHNDVP-----T---                                                 | 392 |
| secC1 | 402 | NIVSSTESVRNNGTGNQGFNNYLTVHPNLP IIRTECAEADTVSICSARTNNDHIVDVDK                                               | 461 |
| glc-1 | 393 | KVFNQEEKVR-----TVPLNR-----RQMNSFLNLL-                                                                      | 419 |
|       |     | M4                                                                                                         |     |
| secC1 | 462 | DKKDTPTFTTMTTPQEIAMWIDRRSRFLFPAMFLAFNALYWTFVY---VL-                                                        | 508 |
| glc-1 | 420 | -----T-KTEWNDISKRVDLISRALFPVLFVFNILYWSRFGQONVLF                                                            | 461 |

**Supplemental Figure S1: secC1 encodes a protein that contains the features of a typical cys-loop pentameric ligand-gated ion channel (pLGIC) subunit.** Amino acid alignment of *secC1* with the *Caenorhabditis elegans* pLGIC subunit *glc-1*. The two cysteines that form the cys-loop are boxed in red. The alpha-helical transmembrane domains M1-M4 are marked with solid green lines. Shading indicates degree of conservation (darker is more conserved) as scored by BLOSUM26 substitution matrix (Henikoff, S. & Henikoff, J.G. Amino Acid Substitution Matrices from Protein Blocks. *Proc. Natl. Acad. Sci. U. S. A.* **89**, 10915–10919 (1992)). Sequences aligned using CLUSTAL W (Thompson, J.D., Higgins, D.G. & Gibson, T.J. CLUSTAL W: improving the sensitivity of progressive multiple sequence alignment through sequence weighting, positions-specific gap penalties and weight matrix choice. *Nucleic Acids Res*, **22**,4673-4680 (1994).)

## Supplemental Data S2

Primers for Amplification of *secCl* cDNA from mRNA:

5'GCGGGGACAAGTTTGTACAAAAAAGCAGGCTCGATATCATGAATCTGCATCTGAG  
TGA3'

5'GGGGACCACTTTGTACAAGAAAGCTGGGTGAGCTCTAGATTACAAAACATAGACG  
AGGT3'.

Primers for amplification of *secCl* genomic rescuing fragment:

5'CACCAATCGACGCAGGTAAATGGAC 3' and

5'AGGATCGAGGATAGACGCATGGTT3'.

Primers for amplification of *secCl* promoter for *secCl*-promoter::GFP fusion:

5'-CACCAATCGACGCAGGTAAATGGAC -3' and

5'-TCTTCCTCGGCTTTGACCCTA-3'

The primers used to introduce site specific mutations to remove extraneous start codons from the promoter:

5'-GCAGATTCCTCAGcTGGcTTGATTC-3' and 5'-TTGGATCACGCTGATCTTGGTC-3'

where lower case letters refer to the nucleotide bases that were mutated.

Primers for amplification of *secCl* intracellular loop for antibody production:

5'TAAGGCCTCTGTCGACCAGTTTGCCTTTGTCAACAC3'

5'CAGAAATTCGCAAGCTTCTACGGCGTGCCTTTTTATCCT-3'

Nucleotides 1-16 of both primers correspond to homologous portions of the pEcoli- Nterm 6xHN vector.
